# Supplementary material
Source: bioRxiv or medRxiv preprint supplement (https://www.biorxiv.org/highwire/filestream/137391/field_highwire_adjunct_files/5/361105-6.pdf)
Supplement: Supplementary file [file 361105-6.pdf]

| GiardiaDB      | annotation                   | MW (kDa) | PFAM                             | localization | EM    | body | DM | LC | OZ | VG | DB | MB | FL | cyFL | bb | citation              | other localization                  |
|----------------|------------------------------|----------|----------------------------------|--------------|-------|------|----|----|----|----|----|----|----|------|----|-----------------------|-------------------------------------|
| GL50803_5188   | ankyrin repeat protein       | 57       | ankyrin                          | C-term GFP   |       | disc | DM |    | OZ | VG |    | MB |    |      |    | Figure S3             | none                                |
| GL50803_16343  | median body protein          | 101      | none                             | C-term GFP   | MT/OZ | disc | DM |    | OZ | VG |    | MB |    |      |    | Figure S3             | none                                |
| GL50803_5374   | tubulin-specific chaperone B | 26       | CAP-GLY                          | C-term GFP   |       | disc | DM |    | OZ | VG |    |    |    |      |    | Figure S3             | none                                |
| GL50803_24537  | hypothetical protein         | 59       | none                             | C-term GFP   |       | disc | DM |    | OZ |    | DB | MB |    | cyFL |    | Figure S4             | cytoplasmic caudal axoneme          |
| GL50803_137684 | ankyrin repeat protein       | 146      | ankyrin                          | C-term GFP   |       | disc | DM |    | OZ |    |    | MB |    | cyFL |    | Figure S3             | all cytoplasmic axonemes            |
| GL50803_11683  | alpha3-giardin               | 33       | annexin                          | AU1 tag      |       | disc | DM |    |    | VG |    |    |    |      |    | Weiland et al. (2005) | none                                |
| GL50803_3256   | epsin                        | 134      | ENTH                             | HA tag       |       | disc | DM |    |    |    |    |    |    |      |    | Ebneter et al. (2014) | none                                |
| GL50803_4852   | hypothetical protein         | 49       | none                             | HA tag       |       | disc | DM |    |    |    |    |    |    |      |    | Lauwaet et al. (2011) | none                                |
| GL50803_8726   | hypothetical protein         | 106      | none                             | C-term GFP   |       | disc |    |    | OZ | VG |    | MB |    |      |    | Figure S1             | none                                |
| GL50803_86815  | hypothetical protein         | 134      | none                             | C-term GFP   |       | disc |    |    | OZ | VG |    | MB |    |      |    | Figure S1             | median body, cytoplasm              |
| GL50803_13590  | ankyrin repeat protein       | 72       | ankyrin                          | C-term GFP   |       | disc |    |    | OZ | VG |    |    |    | cyFL |    | Figure S1             | cytoplasmic anterior axonemes       |
| GL50803_4812   | beta giardin                 | 31       | SF-assemblin                     | antibody     | MR    | disc |    |    | OZ | VG |    |    |    |      |    | Baker et al. (1988)   | none                                |
| GL50803_103807 | ankyrin repeat protein       | 103      | ankyrin                          | C-term GFP   |       | disc |    |    | OZ | VG |    |    |    |      |    | Figure S1             | none                                |
| GL50803_112557 | ankyrin repeat protein       | 89       | ankyrin                          | C-term GFP   |       | disc |    |    | OZ | VG |    |    |    |      |    | Figure S1             | none                                |
| GL50803_7268   | ankyrin repeat protein       | 126      | ankyrin                          | C-term GFP   |       | disc |    |    | OZ | VG |    |    |    |      |    | Figure S1             | none                                |
| GL50803_4977   | Nek kinase GK282             | 42       | NEK                              | C-term GFP   |       | disc |    |    | OZ | VG |    |    |    |      |    | Figure S1             | none                                |
| GL50803_4239   | hypothetical protein         | 11       | none                             | C-term GFP   |       | disc |    |    | OZ | VG |    |    |    |      |    | Figure S1             | cytoplasm                           |
| GL50803_15918  | hypothetical protein         | 25       | none                             | C-term GFP   |       | disc |    |    | OZ | VG |    |    |    |      |    | Figure S1             | none                                |
| GL50803_4410   | SALP-1                       | 28       | SF assemblin                     | C-term GFP   | MR    | disc |    |    | OZ | VG |    |    |    |      |    | Figure S1             | none                                |
| GL50803_86676  | delta-giardin                | 34       | SF-assemblin                     | C-term GFP   | MR    | disc |    |    | OZ | VG |    |    |    |      |    | Figure S1             | none                                |
| GL50803_17230  | gamma giardin                | 36       | none                             | antibody     |       | disc |    |    | OZ | VG |    |    |    |      |    | Nohria et al. (1992)  | none                                |
| GL50803_5883   | hypothetical protein         | 63       | none                             | C-term GFP   |       | disc |    |    | OZ |    | DB | MB |    |      |    | Figure S4             | none                                |
| GL50803_40016  | ankyrin repeat protein       | 72       | ankyrin                          | C-term GFP   |       | disc |    |    | OZ |    |    | MB |    |      |    | Figure S1             | none                                |
| GL50803_9515   | ankyrin repeat protein       | 150      | ankyrin                          | C-term GFP   |       | disc |    |    | OZ |    |    | MB |    |      |    | Figure S1             | none                                |
| GL50803_4912   | Nek kinase GK265             | 33       | NEK                              | C-term GFP   |       | disc |    |    | OZ |    |    | MB |    |      |    | Figure S1             | none                                |
| GL50803_3934   | hypothetical protein         | 65       | none                             | C-term GFP   |       | disc |    |    | OZ |    |    | MB |    |      |    | Figure S1             | none                                |
| GL50803_17053  | ankyrin repeat protein       | 14       | ankyrin                          | C-term GFP   |       | disc |    |    | OZ |    |    |    |    |      |    | Figure S1             | none                                |
| GL50803_13766  | ankyrin repeat protein       | 93       | ankyrin                          | C-term GFP   |       | disc |    |    | OZ |    |    |    |    |      |    | Figure S1             | none                                |
| GL50803_14859  | ankyrin repeat protein       | 103      | ankyrin                          | C-term GFP   |       | disc |    |    | OZ |    |    |    |    |      |    | Figure S1             | none                                |
| GL50803_17551  | ankyrin repeat protein       | 119      | ankyrin                          | C-term GFP   |       | disc |    |    | OZ |    |    |    |    |      |    | Figure S1             | none                                |
| GL50803_10524  | hypothetical protein         | 27       | none                             | C-term GFP   |       | disc |    |    | OZ |    |    |    |    |      |    | Figure S1             | none                                |
| GL50803_14681  | ankyrin repeat protein       | 56       | ankyrin                          | C-term GFP   |       | disc |    | LC |    | VG |    |    |    | cyFL | BB | Figure S4             | all cytoplasmic axonemes, no nuclei |
| GL50803_7796   | alpha2-giardin               | 34       | annexin                          | C-term GFP   |       | disc |    |    |    | VG |    |    |    | FL   |    | House et al. (2011)   | ventral flagella                    |
| GL50803_7797   | alpha5-giardin               | 33       | annexin                          | AU1 tag      |       | disc |    |    |    | VG |    |    |    | FL   |    | Weiland et al. (2005) | ventral flagella                    |
| GL50803_15101  | alpha17-giardin              | 34       | annexin                          | AU1 tag      |       | disc |    |    |    | VG |    |    |    | FL   |    | Weiland et al. (2005) | ventral flagella                    |
| GL50803_92498  | Nek kinase GK270             | 99       | NEK                              | AU1 tag      |       | disc |    |    |    | VG |    |    |    | cyFL | BB | Davids et al. (2011)  | anterior axonemes                   |
| GL50803_5010   | Ser/Thr Phos PP2A            | 38       | calcineurin-like phosphoesterase | antibody     |       | disc |    |    |    | VG |    |    |    |      | BB | Lauwaet et al. (2007) | none                                |
| GL50803_7414   | ankyrin repeat protein       | 41       | ankyrin                          | C-term GFP   |       | disc |    |    |    | VG |    |    |    |      |    | Figure S3             | none                                |
| GL50803_2556   | hypothetical protein         | 10       | none                             | C-term GFP   |       | disc |    |    |    |    |    | MB | FL | cyFL |    | Figure S1             | all flagella                        |
| GL50803_10181  | hypothetical protein         | 83       | none                             | C-term GFP   |       | disc |    |    |    |    |    |    |    | cyFL |    | Figure S1             | all cytoplasmic axonemes            |
| GL50803_16279  | Nek kinase GK256             | 75       | NEK                              | AU1 tag      |       | disc |    |    |    |    |    |    |    |      | BB | Davids et al. (2011)  | none                                |
| GL50803_5358   | aurora kinase                | 34       | kinase                           | antibody     |       | disc |    |    |    |    |    |    |    |      |    | Davids et al. (2008)  | none                                |
| GL50803_3760   | ankyrin repeat protein       | 51       | ankyrin                          | C-term GFP   |       | disc |    |    |    |    |    |    |    |      |    | Figure S1             | cytoplasm                           |

|                |                                |     |               |            |      |    |    |    |      |                     |                                      |                                     |                                     |
|----------------|--------------------------------|-----|---------------|------------|------|----|----|----|------|---------------------|--------------------------------------|-------------------------------------|-------------------------------------|
| GL50803_24321  | Nek kinase GK261               | 32  | NEK           | C-term GFP | disc |    |    |    |      | Figure S1           | none                                 |                                     |                                     |
| GL50803_16272  | Nek kinase GK187               | 136 | NEK, ankyrin  | C-term GFP | DM   | OZ | VG | MB |      | Figure S3           | none                                 |                                     |                                     |
| GL50803_17412  | hypothetical protein           | 80  | none          | C-term GFP | DM   | OZ | VG | MB |      | Figure S3           | none                                 |                                     |                                     |
| GL50803_12139  | ankyrin repeat protein         | 76  | ankyrin       | C-term GFP | DM   | OZ | VG |    |      | Figure S3           | none                                 |                                     |                                     |
| GL50803_17563  | ERK1 kinase                    | 42  | kinase        | antibody   | DM   |    | VG |    |      | Ellis et al. (2003) | none                                 |                                     |                                     |
| GL50803_5489   | Nek kinase GK271               | 61  | NEK           | C-term GFP | DM   |    | VG |    |      | Figure S3           | none                                 |                                     |                                     |
| GL50803_13981  | Nek kinase GK185               | 123 | NEK, ankyrin  | C-term GFP | DM   |    | VG |    |      | Figure S3           | none                                 |                                     |                                     |
| GL50803_6751   | hypothetical protein           | 113 | none          | C-term GFP | DM   |    | VG |    |      | Figure S3           | none                                 |                                     |                                     |
| GL50803_15499  | hypothetical protein           | 49  | none          | C-term GFP | DM   |    |    | DB |      | Figure S4           | none                                 |                                     |                                     |
| GL50803_41512  | DUF1126 domain                 | 74  | DUF1126       | C-term GFP | DM   |    |    | MB | FL   | Figure S2           | all flagella                         |                                     |                                     |
| GL50803_6709   | hypothetical protein           | 58  | none          | C-term GFP | DM   |    |    | MB | FL   | Figure S2           | all flagella                         |                                     |                                     |
| GL50803_16935  | hypothetical protein           | 94  | none          | C-term GFP | DM   |    |    | MB | FL   | Figure S2           | all flagella                         |                                     |                                     |
| GL50803_9148   | SHIPPO repeat family protein   | 22  | SHIPPO-repeat | C-term GFP | DM   |    |    | MB | FL   | Figure S2           | all flagella                         |                                     |                                     |
| GL50803_7520   | hypothetical protein           | 54  | none          | C-term GFP | DM   |    |    | MB | cyFL | BB                  | Figure S2                            | caudal cytoplasmic axonemes         |                                     |
| GL50803_17097  | ankyrin repeat protein         | 163 | ankyrin       | C-term GFP | DM   |    |    | MB | cyFL | Figure S2           | cytoplasmic anterior axonemes        |                                     |                                     |
| GL50803_103164 | SHIPPO repeat family protein   | 44  | SHIPPO-repeat | C-term GFP | DM   |    |    | MB | cyFL | Figure S2           | all cytoplasmic axonemes             |                                     |                                     |
| GL50803_5568   | DUF866 domain protein          | 17  | DUF866        | C-term GFP | DM   |    |    |    | cyFL | BB                  | Figure S2                            | caudal cytoplasmic axonemes         |                                     |
| GL50803_10893  | Nek kinase GK193               | 35  | NEK           | C-term GFP | DM   |    |    |    | cyFL | BB                  | Figure S2                            | all cytoplasmic axonemes, cytoplasm |                                     |
| GL50803_11775  | Nek kinase GK301               | 178 | NEK, ankyrin  | C-term GFP | DM   |    |    |    | cyFL | BB                  | Figure S2                            | all cytoplasmic axonemes            |                                     |
| GL50803_102455 | GiKIN6a                        | 131 | kinesin-6     | C-term GFP | DM   |    |    |    | cyFL | Figure S2           | cytoplasmic posteriolateral axonemes |                                     |                                     |
| GL50803_17096  | ankyrin repeat protein         | 85  | ankyrin       | C-term GFP | DM   |    |    |    |      | BB                  | Figure S2                            | none                                |                                     |
| GL50803_16424  | Mlf1IP domain protein          | 30  | Mlf1IP        | C-term GFP | DM   |    |    |    |      | BB                  | Figure S2                            | none                                |                                     |
| GL50803_15576  | ankyrin repeat protein         | 82  | ankyrin       | C-term GFP | DM   |    |    |    |      | Figure S2           | bare area edge                       |                                     |                                     |
| GL50803_24194  | ankyrin repeat protein         | 86  | ankyrin       | C-term GFP | DM   |    |    |    |      | Figure S2           | none                                 |                                     |                                     |
| GL50803_14872  | ankyrin repeat protein         | 137 | ankyrin       | C-term GFP | DM   |    |    |    |      | Figure S2           | none                                 |                                     |                                     |
| GL50803_103810 | ankyrin repeat protein         | 206 | ankyrin       | C-term GFP | DM   |    |    |    |      | Figure S2           | bare area edge                       |                                     |                                     |
| GL50803_14800  | ankyrin repeat protein         | 44  | ankyrin       | C-term GFP | DM   |    |    |    |      | Figure S2           | marginal plates                      |                                     |                                     |
| GL50803_8850   | ankyrin repeat protein         | 83  | ankyrin       | C-term GFP | DM   |    |    |    |      | Figure S2           | none                                 |                                     |                                     |
| GL50803_10219  | ankyrin repeat protein         | 159 | ankyrin       | C-term GFP | DM   |    |    |    |      | Figure S2           | no VG                                |                                     |                                     |
| GL50803_6171   | hypothetical protein           | 17  | none          | C-term GFP | DM   |    |    |    |      | Figure S2           | cytoplasm                            |                                     |                                     |
| GL50803_17090  | SAM domain protein             | 20  | SAM           | C-term GFP |      |    | OZ |    |      | cyFL                | BB                                   | Figure S3                           | none                                |
| GL50803_16263  | conserved hypothetical protein | 12  | DIP13         | C-term GFP |      |    | OZ |    |      | cyFL                | Figure S3                            | cytoplasmic caudal axonemes         |                                     |
| GL50803_16843  | ankyrin repeat protein         | 138 | ankyrin       | C-term GFP |      |    | OZ |    |      | Figure S3           | none                                 |                                     |                                     |
| GL50803_11554  | Nek kinase GK249               | 32  | NEK           | C-term GFP |      |    |    | VG |      | Figure S3           | none                                 |                                     |                                     |
| GL50803_3957   | Nek kinase GK212               | 82  | NEK, ankyrin  | C-term GFP |      |    |    | VG |      | Figure S3           | none                                 |                                     |                                     |
| GL50803_33866  | hypothetical protein           | 76  | none          | C-term GFP |      |    |    |    | DB   | MB                  | cyFL                                 | Figure S4                           | all cytoplasmic axonemes            |
| GL50803_10232  | hypothetical protein           | 74  | none          | C-term GFP |      |    |    |    | DB   | MB                  | Figure S4                            | cytoplasm                           |                                     |
| GL50803_13651  | hypothetical protein           | 76  | none          | C-term GFP |      |    |    |    | DB   | Figure S4           | none                                 |                                     |                                     |
| GL50803_16342  | hypothetical protein           | 182 | none          | C-term GFP |      |    |    |    | DB   | Figure S4           | none                                 |                                     |                                     |
| GL50803_15410  | Ser/Thr protein kinase         | 32  | ankyrin       | C-term GFP |      | LC |    |    |      | cyFL                | BB                                   | Figure S4                           | none                                |
| GL50803_101326 | hypothetical protein           | 35  | none          | C-term GFP |      | LC |    |    |      | cyFL                | BB                                   | Figure S4                           | all cytoplasmic axonemes, cytoplasm |
| GL50803_15218  | WD-40 repeat protein           | 87  | WD40          | C-term GFP |      | LC |    |    |      | cyFL                | Figure S4                            | all cytoplasmic axonemes, cytoplasm |                                     |
| GL50803_23492  | ankyrin repeat protein         | 82  | ankyrin       | C-term GFP |      | LC |    |    |      | Figure S4           | none                                 |                                     |                                     |
| GL50803_17231  | Nek kinase GK186               | 111 | NEK, ankyrin  | C-term GFP |      | LC |    |    |      | Figure S4           | none                                 |                                     |                                     |
